# Supplementary material for: Germline variants and breast cancer survival in patients with distant metastases at primary breast cancer diagnosis
Source: Springer Nature journal article supplement (doi:10.1038/s41598-021-99409-3), 2021-10-05
Supplement: MOESM1 [file 41598_2021_99409_MOESM1_ESM.pdf › 41598_2021_99409_MOESM1_ESM.pdf]

## Supplementary Information

### Germline variants and breast cancer survival in patients with distant metastases at primary breast cancer diagnosis

Maria Escala-Garcia<sup>1</sup>, Sander Canisius<sup>1, 2</sup>, Renske Keeman<sup>1</sup>, Jonathan Beesley<sup>3</sup>, Hoda Anton-Culver<sup>4</sup>, Volker Arndt<sup>5</sup>, Annelie Augustinsson<sup>6</sup>, Heiko Becher<sup>7</sup>, Matthias W. Beckmann<sup>8</sup>, Sabine Behrens<sup>9</sup>, Marina Bermisheva<sup>10</sup>, Stig E. Bojesen<sup>11-13</sup>, Manjeet K. Bolla<sup>14</sup>, Hermann Brenner<sup>5, 15, 16</sup>, Federico Canzian<sup>17</sup>, Jose E. Castela<sup>18</sup>, Jenny Chang-Claude<sup>9, 19</sup>, Stephen J. Chanock<sup>20</sup>, Fergus J. Couch<sup>21</sup>, Kamila Czene<sup>22</sup>, Mary B. Daly<sup>23</sup>, Joe Dennis<sup>14</sup>, Peter Devilee<sup>24, 25</sup>, Thilo Dörk<sup>26</sup>, Alison M. Dunning<sup>27</sup>, Douglas F. Easton<sup>14, 27</sup>, Arif B. Ekici<sup>28</sup>, A. Heather Eliassen<sup>29, 30</sup>, Peter A. Fasching<sup>8, 31</sup>, Henrik Flyger<sup>32</sup>, Manuela Gago-Dominguez<sup>33, 34</sup>, Montserrat Garcia-Closas<sup>20</sup>, José A. García-Sáenz<sup>35</sup>, Jürgen Geisler<sup>36</sup>, Graham G. Giles<sup>37-39</sup>, Mervi Grip<sup>40</sup>, Melanie Gündert<sup>41-43</sup>, Eric Hahnen<sup>44, 45</sup>, Christopher A. Haiman<sup>46</sup>, Niclas Håkansson<sup>47</sup>, Per Hall<sup>22, 48</sup>, Ute Hamann<sup>49</sup>, Jaana M. Hartikainen<sup>50, 51</sup>, Bernadette A.M. Heemskerk-Gerritsen<sup>52</sup>, Antoinette Hollestelle<sup>52</sup>, Reiner Hoppe<sup>53, 54</sup>, John L. Hopper<sup>38</sup>, David J. Hunter<sup>30, 55</sup>, William Jacot<sup>56</sup>, Anna Jakubowska<sup>57, 58</sup>, Esther M. John<sup>59, 60</sup>, Audrey Y. Jung<sup>9</sup>, Rudolf Kaaks<sup>9</sup>, Elza Khusnutdinova<sup>10, 61</sup>, Linetta B. Koppert<sup>62</sup>, Peter Kraft<sup>30, 63</sup>, Vessela N. Kristensen<sup>64</sup>, Allison W. Kurian<sup>59, 60</sup>, Diether Lambrechts<sup>65, 66</sup>, Loic Le Marchand<sup>67</sup>, Annika Lindblom<sup>68, 69</sup>, Robert N. Luben<sup>70, 71</sup>, Jan Lubiński<sup>57</sup>, Arto Mannermaa<sup>50, 51, 72</sup>, Mehdi Manoochehri<sup>49</sup>, Sara Margolin<sup>48, 73</sup>, Dimitrios Mavroudis<sup>74</sup>, Taru A. Muranen<sup>75</sup>, Heli Nevanlinna<sup>75</sup>, Andrew F. Olshan<sup>76</sup>, Håkan Olsson<sup>6</sup>, Tjoung-Won Park-Simon<sup>26</sup>, Alpa V. Patel<sup>77</sup>, Paolo Peterlongo<sup>78</sup>, Paul D.P. Pharoah<sup>14, 27</sup>, Kevin Punie<sup>79</sup>, Paolo Radice<sup>80</sup>, Gad Rennert<sup>81</sup>, Hedy S. Rennert<sup>81</sup>, Atocha Romero<sup>82</sup>, Rebecca Roylance<sup>83</sup>, Thomas Rüdiger<sup>84</sup>, Matthias Ruebner<sup>8</sup>, Emmanouil Saloustros<sup>85</sup>, Elinor J. Sawyer<sup>86</sup>, Rita K. Schmutzler<sup>44, 45, 87</sup>, Minouk J. Schoemaker<sup>88</sup>, Christopher Scott<sup>89</sup>, Melissa C. Southey<sup>37, 39, 90</sup>, Harald Surowy<sup>41, 42</sup>, Anthony J. Swerdlow<sup>88, 91</sup>, Rulla M. Tamimi<sup>30, 92</sup>, Lauren R. Teras<sup>77</sup>, Emilie Thomas<sup>93</sup>, Ian Tomlinson<sup>94, 95</sup>, Melissa A. Troester<sup>76</sup>, Celine M. Vachon<sup>96</sup>, Qin Wang<sup>14</sup>, Robert Winqvist<sup>97, 98</sup>, Alicja Wolk<sup>47, 99</sup>, Argyrios Ziogas<sup>4</sup>, kConFab/AOCS Investigators<sup>100</sup>, Kyriaki Michailidou<sup>14, 101, 102</sup>, Georgia Chenevix-Trench<sup>3</sup>, Thomas Bachelot<sup>103</sup> and Marjanka K. Schmidt<sup>1, 104\*</sup>.

\*Corresponding author

<sup>1</sup> The Netherlands Cancer Institute - Antoni van Leeuwenhoek Hospital, Division of Molecular Pathology, Amsterdam, The Netherlands.

<sup>2</sup> The Netherlands Cancer Institute - Antoni van Leeuwenhoek hospital, Division of Molecular Carcinogenesis, Amsterdam, The Netherlands.

<sup>3</sup> QIMR Berghofer Medical Research Institute, Department of Genetics and Computational Biology, Brisbane, Queensland, Australia.

<sup>4</sup> University of California Irvine, Department of Medicine, Genetic Epidemiology Research Institute, Irvine, CA, USA.

- <sup>5</sup> German Cancer Research Center (DKFZ), Division of Clinical Epidemiology and Aging Research, Heidelberg, Germany.
- <sup>6</sup> Lund University, Department of Cancer Epidemiology, Clinical Sciences, Lund, Sweden.
- <sup>7</sup> University Medical Center Hamburg-Eppendorf, Institute of Medical Biometry and Epidemiology, Hamburg, Germany.
- <sup>8</sup> Comprehensive Cancer Center Erlangen-EMN, University Hospital Erlangen, Friedrich-Alexander University Erlangen-Nuremberg (FAU), Department of Gynecology and Obstetrics, Erlangen, Germany.
- <sup>9</sup> German Cancer Research Center (DKFZ), Division of Cancer Epidemiology, Heidelberg, Germany.
- <sup>10</sup> Ufa Federal Research Centre of the Russian Academy of Sciences, Institute of Biochemistry and Genetics, Ufa, Russia.
- <sup>11</sup> Copenhagen University Hospital, Copenhagen General Population Study, Herlev and Gentofte Hospital, Herlev, Denmark.
- <sup>12</sup> Copenhagen University Hospital, Department of Clinical Biochemistry, Herlev and Gentofte Hospital, Herlev, Denmark.
- <sup>13</sup> University of Copenhagen, Faculty of Health and Medical Sciences, Copenhagen, Denmark.
- <sup>14</sup> University of Cambridge, Centre for Cancer Genetic Epidemiology, Department of Public Health and Primary Care, Cambridge, UK.
- <sup>15</sup> German Cancer Research Center (DKFZ) and National Center for Tumor Diseases (NCT), Division of Preventive Oncology, Heidelberg, Germany.
- <sup>16</sup> German Cancer Research Center (DKFZ), German Cancer Consortium (DKTK), Heidelberg, Germany.
- <sup>17</sup> German Cancer Research Center (DKFZ), Genomic Epidemiology Group, Heidelberg, Germany.
- <sup>18</sup> Instituto de Investigación Sanitaria Galicia Sur (IISGS), Xerencia de Xestión Integrada de Vigo-SERGAS, Oncology and Genetics Unit, Vigo, Spain.
- <sup>19</sup> University Medical Center Hamburg-Eppendorf, Cancer Epidemiology Group, University Cancer Center Hamburg (UCCH), Hamburg, Germany.
- <sup>20</sup> National Cancer Institute, National Institutes of Health, Department of Health and Human Services, Division of Cancer Epidemiology and Genetics, Bethesda, MD, USA.
- <sup>21</sup> Mayo Clinic, Department of Laboratory Medicine and Pathology, Rochester, MN, USA.
- <sup>22</sup> Karolinska Institutet, Department of Medical Epidemiology and Biostatistics, Stockholm, Sweden.
- <sup>23</sup> Fox Chase Cancer Center, Department of Clinical Genetics, Philadelphia, PA, USA.
- <sup>24</sup> Leiden University Medical Center, Department of Pathology, Leiden, The Netherlands.
- <sup>25</sup> Leiden University Medical Center, Department of Human Genetics, Leiden, The Netherlands.
- <sup>26</sup> Hannover Medical School, Gynaecology Research Unit, Hannover, Germany.
- <sup>27</sup> University of Cambridge, Centre for Cancer Genetic Epidemiology, Department of Oncology, Cambridge, UK.
- <sup>28</sup> Comprehensive Cancer Center Erlangen-EMN, University Hospital Erlangen, Friedrich-Alexander University Erlangen-Nuremberg (FAU), Institute of Human Genetics, Erlangen, Germany.
- <sup>29</sup> Brigham and Women's Hospital and Harvard Medical School, Channing Division of Network Medicine, Department of Medicine, Boston, MA, USA.
- <sup>30</sup> Harvard T.H. Chan School of Public Health, Department of Epidemiology, Boston, MA, USA.
- <sup>31</sup> University of California at Los Angeles, David Geffen School of Medicine, Department of Medicine Division of Hematology and Oncology, Los Angeles, CA, USA.
- <sup>32</sup> Copenhagen University Hospital, Department of Breast Surgery, Herlev and Gentofte Hospital, Herlev, Denmark.
- <sup>33</sup> Instituto de Investigación Sanitaria de Santiago de Compostela (IDIS), Complejo Hospitalario Universitario de Santiago, SERGAS, Fundación Pública Galega de Medicina Xenómica, Santiago de Compostela, Spain.

- <sup>34</sup> University of California San Diego, Moores Cancer Center, La Jolla, CA, USA.
- <sup>35</sup> Instituto de Investigación Sanitaria San Carlos (IdISSC), Centro Investigación Biomédica en Red de Cáncer (CIBERONC), Medical Oncology Department, Hospital Clínico San Carlos, Madrid, Spain.
- <sup>36</sup> Akershus University Hospital, Department of Oncology, Lørenskog, Norway.
- <sup>37</sup> Cancer Council Victoria, Cancer Epidemiology Division, Melbourne, Victoria, Australia.
- <sup>38</sup> The University of Melbourne, Centre for Epidemiology and Biostatistics, Melbourne School of Population and Global Health, Melbourne, Victoria, Australia.
- <sup>39</sup> Monash University, Precision Medicine, School of Clinical Sciences at Monash Health, Clayton, Victoria, Australia.
- <sup>40</sup> University of Oulu, Department of Surgery, Oulu University Hospital, Oulu, Finland.
- <sup>41</sup> German Cancer Research Center (DKFZ), Molecular Epidemiology Group, C080, Heidelberg, Germany.
- <sup>42</sup> University of Heidelberg, Molecular Biology of Breast Cancer, University Womens Clinic Heidelberg, Heidelberg, Germany.
- <sup>43</sup> Helmholtz Zentrum München, German Research Center for Environmental Health, Institute of Diabetes Research, Neuherberg, Germany.
- <sup>44</sup> Faculty of Medicine and University Hospital Cologne, University of Cologne, Center for Familial Breast and Ovarian Cancer, Cologne, Germany.
- <sup>45</sup> Faculty of Medicine and University Hospital Cologne, University of Cologne, Center for Integrated Oncology (CIO), Cologne, Germany.
- <sup>46</sup> University of Southern California, Department of Preventive Medicine, Keck School of Medicine, Los Angeles, CA, USA.
- <sup>47</sup> Karolinska Institutet, Institute of Environmental Medicine, Stockholm, Sweden.
- <sup>48</sup> Södersjukhuset, Department of Oncology, Stockholm, Sweden.
- <sup>49</sup> German Cancer Research Center (DKFZ), Molecular Genetics of Breast Cancer, Heidelberg, Germany.
- <sup>50</sup> University of Eastern Finland, Translational Cancer Research Area, Kuopio, Finland.
- <sup>51</sup> University of Eastern Finland, Institute of Clinical Medicine, Pathology and Forensic Medicine, Kuopio, Finland.
- <sup>52</sup> Erasmus MC Cancer Institute, Department of Medical Oncology, Rotterdam, The Netherlands.
- <sup>53</sup> Dr. Margarete Fischer-Bosch-Institute of Clinical Pharmacology, Stuttgart, Germany.
- <sup>54</sup> University of Tübingen, Tübingen, Germany.
- <sup>55</sup> University of Oxford, Nuffield Department of Population Health, Oxford, UK.
- <sup>56</sup> Institut du Cancer de Montpellier, Montpellier University, Montpellier, France.
- <sup>57</sup> Pomeranian Medical University, Department of Genetics and Pathology, Szczecin, Poland.
- <sup>58</sup> Pomeranian Medical University, Independent Laboratory of Molecular Biology and Genetic Diagnostics, Szczecin, Poland.
- <sup>59</sup> Stanford Cancer Institute, Stanford University School of Medicine, Department of Medicine, Division of Oncology, Stanford, CA, USA.
- <sup>60</sup> Stanford University School of Medicine, Department of Epidemiology & Population Health, Stanford, CA, USA.
- <sup>61</sup> Bashkir State University, Department of Genetics and Fundamental Medicine, Ufa, Russia.
- <sup>62</sup> Erasmus MC Cancer Institute, Department of Surgical Oncology, Family Cancer Clinic, Rotterdam, The Netherlands.
- <sup>63</sup> Harvard T.H. Chan School of Public Health, Program in Genetic Epidemiology and Statistical Genetics, Boston, MA, USA.
- <sup>64</sup> Oslo University Hospital and University of Oslo, Department of Medical Genetics, Oslo, Norway.
- <sup>65</sup> VIB Center for Cancer Biology, Leuven, Belgium.

- <sup>66</sup> University of Leuven, Laboratory for Translational Genetics, Department of Human Genetics, Leuven, Belgium.
- <sup>67</sup> University of Hawaii Cancer Center, Epidemiology Program, Honolulu, HI, USA.
- <sup>68</sup> Karolinska Institutet, Department of Molecular Medicine and Surgery, Stockholm, Sweden.
- <sup>69</sup> Karolinska University Hospital, Department of Clinical Genetics, Stockholm, Sweden.
- <sup>70</sup> NIHR Biomedical Research Centre, Moorfields Eye Hospital NHS Foundation Trust and UCL Institute of Ophthalmology, London, England, UK.
- <sup>71</sup> Medical Research Council (MRC) Epidemiology Unit, University of Cambridge, Cambridge, United Kingdom.
- <sup>72</sup> Kuopio University Hospital, Biobank of Eastern Finland, Kuopio, Finland.
- <sup>73</sup> Karolinska Institutet, Department of Clinical Science and Education, Södersjukhuset, Stockholm, Sweden.
- <sup>74</sup> University Hospital of Heraklion, Department of Medical Oncology, Heraklion, Greece.
- <sup>75</sup> University of Helsinki, Department of Obstetrics and Gynecology, Helsinki University Hospital, Helsinki, Finland.
- <sup>76</sup> University of North Carolina at Chapel Hill, Department of Epidemiology, Gillings School of Global Public Health and UNC Lineberger Comprehensive Cancer Center, Chapel Hill, NC, USA.
- <sup>77</sup> American Cancer Society, Department of Population Science, Atlanta, GA, USA.
- <sup>78</sup> IFOM - the FIRC Institute of Molecular Oncology, Genome Diagnostics Program, Milan, Italy.
- <sup>79</sup> Leuven Cancer Institute, University Hospitals Leuven, Department of General Medical Oncology and Multidisciplinary Breast Centre, Leuven, Belgium.
- <sup>80</sup> Fondazione IRCCS Istituto Nazionale dei Tumori (INT), Unit of Molecular Bases of Genetic Risk and Genetic Testing, Department of Research, Milan, Italy.
- <sup>81</sup> Carmel Medical Center and Technion Faculty of Medicine, Clalit National Cancer Control Center, Haifa, Israel.
- <sup>82</sup> Hospital Universitario Puerta de Hierro, Medical Oncology Department, Madrid, Spain.
- <sup>83</sup> UCLH Foundation Trust, Department of Oncology, London, UK.
- <sup>84</sup> Staedisches Klinikum Karlsruhe, Institute of Pathology, Karlsruhe, Germany.
- <sup>85</sup> University Hospital of Larissa, Department of Oncology, Larissa, Greece.
- <sup>86</sup> King's College London, School of Cancer & Pharmaceutical Sciences, Comprehensive Cancer Centre, Guy's Campus, London, UK.
- <sup>87</sup> Faculty of Medicine and University Hospital Cologne, University of Cologne, Center for Molecular Medicine Cologne (CMMC), Cologne, Germany.
- <sup>88</sup> The Institute of Cancer Research, Division of Genetics and Epidemiology, London, UK.
- <sup>89</sup> Mayo Clinic, Department of Health Sciences Research, Rochester, MN, USA.
- <sup>90</sup> The University of Melbourne, Department of Clinical Pathology, Melbourne, Victoria, Australia.
- <sup>91</sup> The Institute of Cancer Research, Division of Breast Cancer Research, London, UK.
- <sup>92</sup> Weill Cornell Medicine, Department of Population Health Sciences, New York, NY, USA.
- <sup>93</sup> Plateforme de Bioinformatique Gilles Thomas, Centre de recherche en cancérologie de Lyon, Fondation Synergie Lyon Cancer, Université Claude Bernard Lyon 1, Lyon, France
- <sup>94</sup> University of Birmingham, Institute of Cancer and Genomic Sciences, Birmingham, UK.
- <sup>95</sup> University of Oxford, Wellcome Trust Centre for Human Genetics and Oxford NIHR Biomedical Research Centre, Oxford, UK.
- <sup>96</sup> Mayo Clinic, Department of Health Science Research, Division of Epidemiology, Rochester, MN, USA.
- <sup>97</sup> University of Oulu, Laboratory of Cancer Genetics and Tumor Biology, Cancer and Translational Medicine Research Unit, Biocenter Oulu, Oulu, Finland.

<sup>98</sup> Northern Finland Laboratory Centre Oulu, Laboratory of Cancer Genetics and Tumor Biology, Oulu, Finland.

<sup>99</sup> Uppsala University, Department of Surgical Sciences, Uppsala, Sweden.

<sup>100</sup> Peter MacCallum Cancer Center, Melbourne, Victoria, Australia.

<sup>101</sup> The Cyprus Institute of Neurology & Genetics, Biostatistics Unit, Nicosia, Cyprus.

<sup>102</sup> The Cyprus Institute of Neurology & Genetics, Cyprus School of Molecular Medicine, Nicosia, Cyprus.

<sup>103</sup> Centre Léon Bérard, Département de Cancérologie Médicale, Lyon, France

<sup>104</sup> The Netherlands Cancer Institute - Antoni van Leeuwenhoek hospital, Division of Psychosocial Research and Epidemiology, Amsterdam, The Netherlands.

## Supplementary Tables

**Supplementary Table 1.** Data description and design of the studies included in the analysis.

**Supplementary Table 2.** Results of the top 100 variants in the analysis of all breast cancer-specific survival for patients with metastasis at primary breast cancer diagnosis.

**Supplementary Table 3.** Results of the top 100 variants in the analysis of ER-positive breast cancer-specific survival for patients with metastasis at primary breast cancer diagnosis.

**Supplementary Table 4.** Results of the top 100 variants in the analysis of ER-negative breast cancer-specific survival for patients with metastasis at primary breast cancer diagnosis.
